# Supplementary material
Source: PubMed Central journal article supplement (PMC9404457)
Supplement: NIHMS1824596-supplement-supplementary_Figure_1.pdf [file NIHMS1824596-supplement-supplementary_Figure_1.pdf]

## Mechanisms and Inhibition of Porcupine-Mediated Wnt Acylation

Yang Liu<sup>1,5</sup>, Xiaofeng Qi<sup>1,5</sup>, Linda Donnelly<sup>1</sup>, Nadia Elghobashi-Meinhardt<sup>2</sup>, Tao Long<sup>1</sup>,

Rich W. Zhou<sup>3</sup>, Yingyuan Sun<sup>1</sup>, Boyuan Wang<sup>3</sup> and Xiaochun Li<sup>1,4\*</sup>

<sup>1</sup> Department of Molecular Genetics, University of Texas Southwestern Medical Center, Dallas, TX

75390, USA, <sup>2</sup>Institute of Chemistry, Technical University Berlin, 10623 Berlin, Germany, <sup>3</sup>Department

of Pharmacology, University of Texas Southwestern Medical Center, Dallas, TX 75390, USA and

<sup>4</sup>Department of Biophysics, University of Texas Southwestern Medical Center, Dallas, TX 75390, USA.

<sup>5</sup>These authors contributed equally to this work: Yang Liu and Xiaofeng Qi.

\*Correspondence: [xiaochun.li@utsouthwestern.edu](mailto:xiaochun.li@utsouthwestern.edu) (X.L.)

### Contents

|                              |   |
|------------------------------|---|
| Supplementary Figure 1 ..... | 1 |
| Supplementary Video 1 .....  | 2 |
| Supplementary Video 2 .....  | 2 |
| Supplementary Video 3 .....  | 2 |
| Supplementary Video 4 .....  | 2 |

**Supplementary Figure 1 Uncropped gels**

**a,** Uncropped gel for Extended Data Fig. 2a.

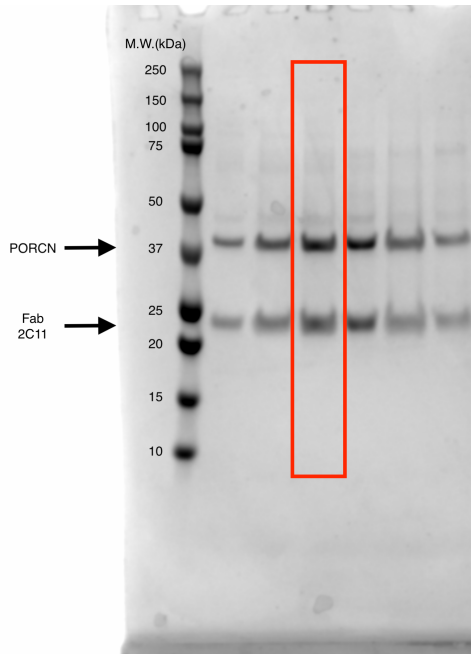

**b,** Uncropped gel for Extended Data Fig. 9a.

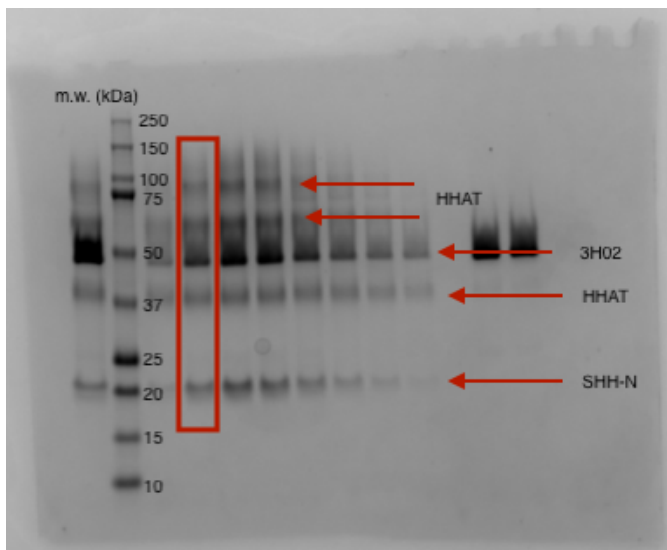

**Supplementary Video 1 Molecular dynamics simulations of PORCN with palmitoleoyl-CoA in curled-up conformation in 100 ns time scale.**

The PORCN is colored in cyan, and the palmitoleoyl-CoA is colored in orange. Residues Trp300 and His357 are shown in sticks.

**Supplementary Video 2 Molecular dynamics simulations of PORCN with palmitoleoyl-CoA in curled-down conformation in 100 ns time scale.**

The PORCN is colored in cyan, and the palmitoleoyl-CoA is colored in gray. Residues Trp300 and His357 are shown in sticks.

**Supplementary Video 3 Molecular dynamics simulations of WNT3A-PORCN complex in 100 ns time scale.**

The PORCN is colored in cyan and the WNT3A is colored in blue. The disulfide bonds are shown in sticks.

**Supplementary Video 4 Molecular dynamics simulations of PORCN in 100 ns time scale.**

The PORCN-TM11 is colored in red.
